# Supplementary material
Source: bioRxiv or medRxiv preprint supplement (https://medrxiv.org/highwire/filestream/76851/field_highwire_adjunct_files/1/2020.04.13.20064006-2.pdf)

**Additional File 2:** Pairwise linkage disequilibrium (LD) among the variants tested in the mQTL analysis of the methylation site cg13139646. The top panel depicts the location of the variants. The intensity of the box shading is proportional to the strength of the LD ( $r^2$ ) for the marker pair, which is also indicated as a percentage of  $r^2$  within each box.

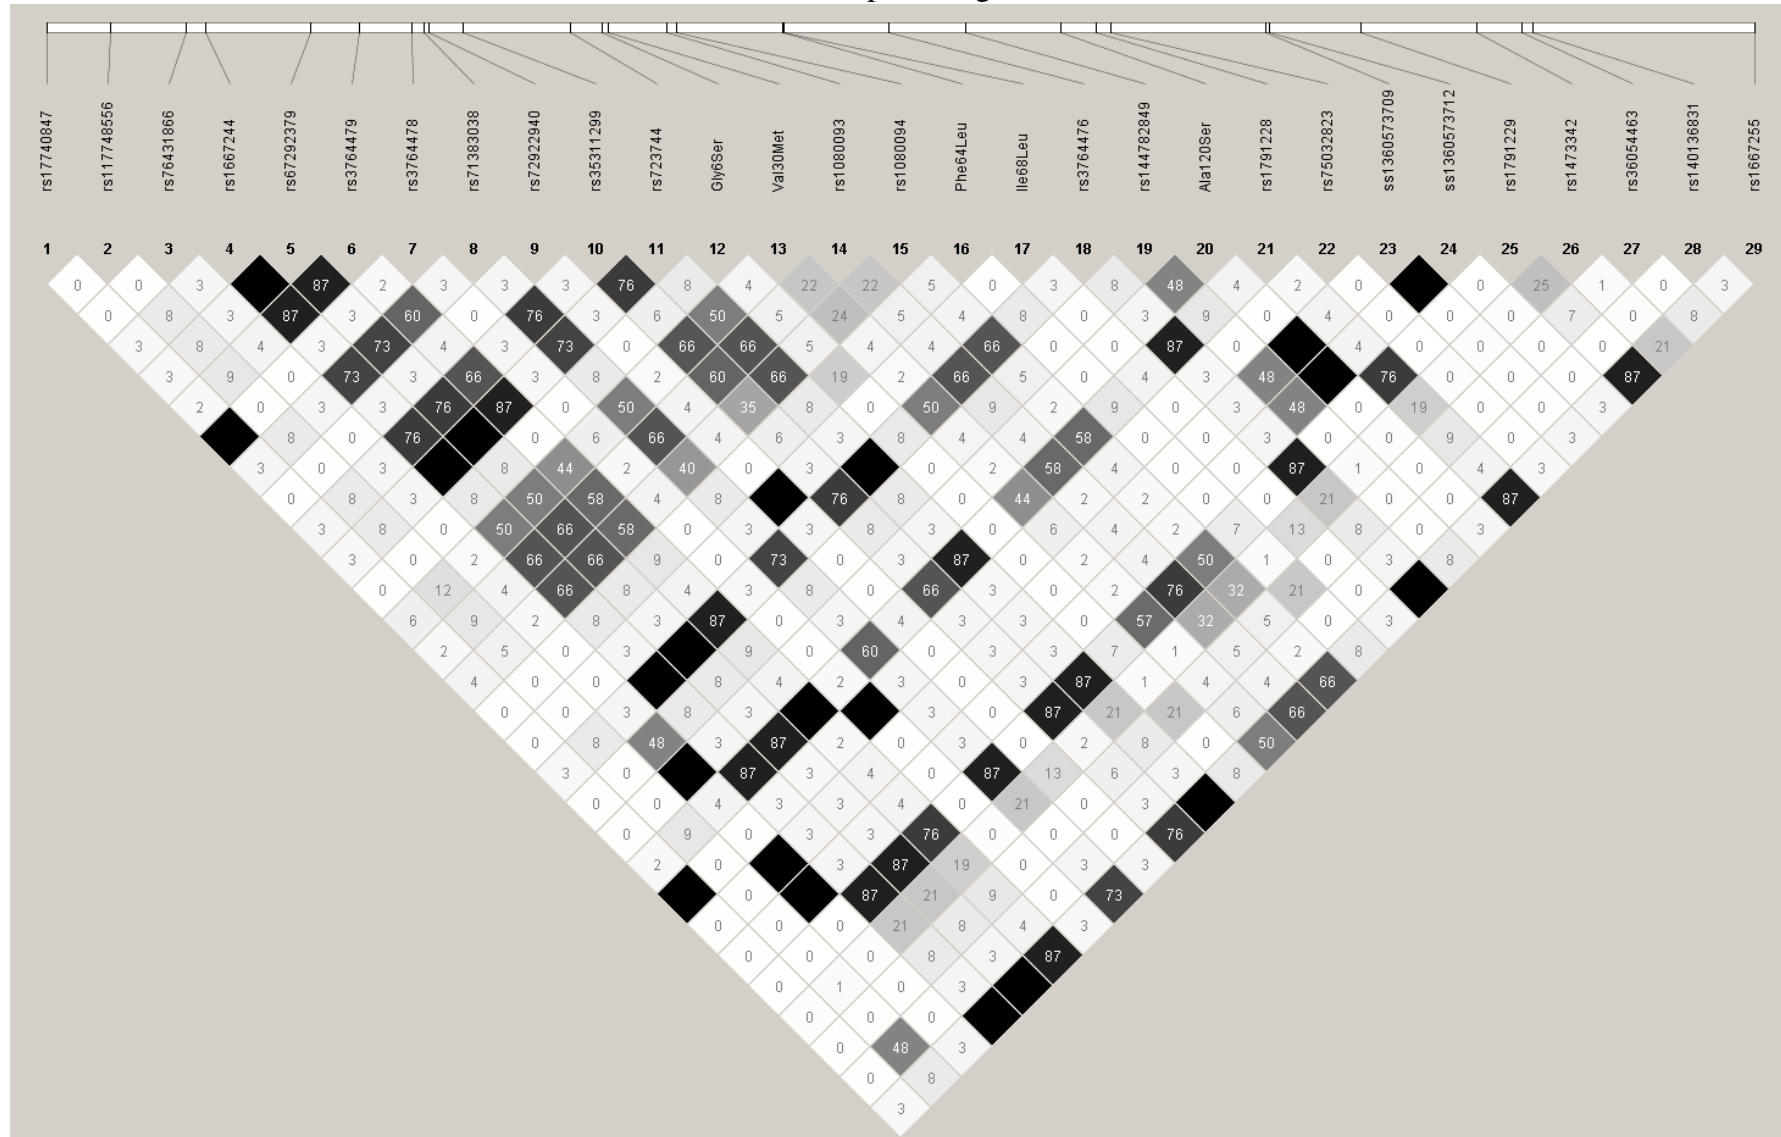

Supplement: Supplementary file [file 2020.04.13.20064006-2.pdf]
